# Supplementary material for: Influence of N-donor sites in 5-(x-pyridyl)-1H-tetrazole ligands (x = 2, 4) on assembly of polyoxometalate-based compounds modified by multinuclear metal clusters and infinite chains
Source: Royal Society of Chemistry journal article supplement (doi:10.1039/c4ce02438a), 2015-01-01
Supplement: c4ce02438a1.pdf [file c4ce02438a1.pdf]

Supplementary Material (ESI) for CrystEngComm  
This journal is © The Royal Society of Chemistry

---

## Influence of N-donor Site in 5-(x-pyridyl)-1H-tetrazole Ligands (x = 2, 4) on Assembly of Polyoxometalates-based Compounds Modified by Multinuclear Metal Clusters and Infinite Chains

Xiu-Li Wang,\* Tian-Jiao Li, Ai-Xiang Tian\*, Na Li, Yang Yang, Ya-Li Ning and Xue Hou

*Department of Chemistry, Bohai University, Jinzhou, 121000, P. R. China*

**Table. S1.** Selected bond lengths (Å) and bond angles (°) for compounds 1–4.

|                   |          |                   |           |
|-------------------|----------|-------------------|-----------|
| Cu(1)-N(2)        | 1.940(8) | Cu(1)-N(7)        | 1.959(8)  |
| Cu(1)-N(1)        | 2.029(8) | Cu(1)-N(6)        | 2.036(9)  |
| O(1W)-Cu(3)       | 1.921(7) | O(1W)-Cu(4)       | 1.965(7)  |
| O(2W)-Cu(2)       | 1.995(7) | N(9)-Cu(2)        | 2.215(9)  |
| N(11)-Cu(2)       | 2.027(9) | N(12)-Cu(2)       | 1.994(9)  |
| N(13)-Cu(3)       | 2.009(8) | N(14)-Cu(4)       | 2.014(9)  |
| N(16)-Cu(3)       | 2.052(8) | N(17)-Cu(3)       | 1.991(8)  |
| N(18)-Cu(2)       | 1.972(9) | Cu(3)-N(4)#2      | 2.325(10) |
| Cu(4)-O(1W)#3     | 1.965(7) | Cu(4)-N(14)#3     | 2.014(9)  |
| N(2)-Cu(1)-N(7)   | 170.8(4) | N(2)-Cu(1)-N(1)   | 81.3(3)   |
| N(7)-Cu(1)-N(1)   | 99.0(3)  | N(2)-Cu(1)-N(6)   | 97.6(4)   |
| N(7)-Cu(1)-N(6)   | 80.9(3)  | N(1)-Cu(1)-N(6)   | 173.0(4)  |
| Cu(3)-O(1W)-Cu(4) | 119.5(4) | C(2)-N(1)-Cu(1)   | 114.3(7)  |
| C(4)-N(1)-Cu(1)   | 127.1(7) | C(1)-N(2)-Cu(1)   | 115.4(7)  |
| N(3)-N(2)-Cu(1)   | 138.8(7) | N(3)-N(4)-Cu(3)#2 | 114.8(7)  |
| N(5)-N(4)-Cu(3)#2 | 133.8(7) | C(8)-N(6)-Cu(1)   | 114.1(7)  |
| C(12)-N(6)-Cu(1)  | 128.0(8) | C(7)-N(7)-Cu(1)   | 115.6(7)  |
| N(8)-N(7)-Cu(1)   | 139.5(7) | N(8)-N(9)-Cu(2)   | 121.4(6)  |
| C(18)-N(11)-Cu(2) | 125.0(8) | C(14)-N(11)-Cu(2) | 115.8(7)  |

\* Corresponding author. Tel.: +86-416-3400158

E-mail address: [wangxiuli@bhu.edu.cn](mailto:wangxiuli@bhu.edu.cn) (X.-L. Wang); [tian@bhu.edu.cn](mailto:tian@bhu.edu.cn) (A.-X. Tian)

**Supplementary Material (ESI) for CrystEngComm**  
**This journal is © The Royal Society of Chemistry**

|                       |          |                     |          |
|-----------------------|----------|---------------------|----------|
| N(13)-N(12)-Cu(2)     | 138.1(6) | C(13)-N(12)-Cu(2)   | 114.4(7) |
| N(12)-N(13)-Cu(3)     | 128.3(6) | N(14)-N(13)-Cu(3)   | 122.4(7) |
| N(13)-N(14)-Cu(4)     | 118.4(6) | N(15)-N(14)-Cu(4)   | 129.7(7) |
| C(24)-N(16)-Cu(3)     | 128.6(8) | C(20)-N(16)-Cu(3)   | 113.8(7) |
| C(19)-N(17)-Cu(3)     | 113.1(7) | N(18)-N(17)-Cu(3)   | 140.1(7) |
| N(19)-N(18)-Cu(2)     | 124.4(7) | N(17)-N(18)-Cu(2)   | 126.4(7) |
| N(18)-Cu(2)-O(2W)     | 92.6(4)  | N(18)-Cu(2)-N(12)   | 93.7(4)  |
| O(2W)-Cu(2)-N(12)     | 163.6(3) | N(18)-Cu(2)-N(11)   | 173.6(4) |
| O(2W)-Cu(2)-N(11)     | 93.4(4)  | N(12)-Cu(2)-N(11)   | 79.9(4)  |
| N(18)-Cu(2)-N(9)      | 90.2(4)  | O(2W)-Cu(2)-N(9)    | 97.1(3)  |
| N(12)-Cu(2)-N(9)      | 98.0(3)  | N(11)-Cu(2)-N(9)    | 91.2(3)  |
| O(1W)-Cu(3)-N(17)     | 173.9(3) | O(1W)-Cu(3)-N(13)   | 88.8(3)  |
| N(17)-Cu(3)-N(13)     | 91.4(3)  | O(1W)-Cu(3)-N(16)   | 98.3(3)  |
| N(17)-Cu(3)-N(16)     | 80.5(3)  | N(13)-Cu(3)-N(16)   | 167.0(3) |
| O(1W)-Cu(3)-N(4)#2    | 93.5(3)  | N(17)-Cu(3)-N(4)#2  | 92.5(3)  |
| N(13)-Cu(3)-N(4)#2    | 90.7(3)  | N(16)-Cu(3)-N(4)#2  | 99.7(4)  |
| O(1W)-Cu(4)-O(1W)#3   | 180.0(1) | O(1W)-Cu(4)-N(14)   | 89.7(3)  |
| O(1W)#3-Cu(4)-N(14)   | 90.3(3)  | O(1W)-Cu(4)-N(14)#3 | 90.3(3)  |
| O(1W)#3-Cu(4)-N(14)#3 | 89.7(3)  | N(14)-Cu(4)-N(14)#3 | 180.0(2) |

Symmetry codes for **1**: #1 -x+2,-y-2,-z+2    #2 -x+3,-y-1,-z+1    #3 -x+4,-y-1,-z

|                    |          |                   |          |
|--------------------|----------|-------------------|----------|
| Cu(1)-N(3)#1       | 1.974(7) | Cu(1)-N(1)        | 1.990(7) |
| Cu(1)-N(2)         | 2.001(7) | Cu(1)-O(1W)       | 2.012(7) |
| Cu(1)-N(7)         | 2.253(6) | N(9)-Cu(2)#3      | 1.984(6) |
| N(10)-Cu(2)        | 2.005(6) | N(11)-Cu(3)       | 2.012(7) |
| N(12)-Cu(3)        | 2.037(6) | N(14)-Cu(2)       | 2.014(7) |
| Cu(2)-N(9)#3       | 1.984(6) | Cu(3)-N(11)#4     | 2.012(7) |
| Cu(3)-N(12)#4      | 2.037(6) | N(3)#1-Cu(1)-N(1) | 174.3(3) |
| N(3)#1-Cu(1)-N(2)  | 93.9(3)  | N(1)-Cu(1)-N(2)   | 80.8(3)  |
| N(3)#1-Cu(1)-O(1W) | 90.9(3)  | N(1)-Cu(1)-O(1W)  | 92.0(3)  |

**Supplementary Material (ESI) for CrystEngComm**  
**This journal is © The Royal Society of Chemistry**

|                       |          |                     |          |
|-----------------------|----------|---------------------|----------|
| N(2)-Cu(1)-O(1W)      | 142.1(3) | N(3)#1-Cu(1)-N(7)   | 100.0(2) |
| N(1)-Cu(1)-N(7)       | 83.5(2)  | N(2)-Cu(1)-N(7)     | 104.7(2) |
| O(1W)-Cu(1)-N(7)      | 111.4(3) | C(2)-N(1)-Cu(1)     | 115.8(5) |
| C(6)-N(1)-Cu(1)       | 125.9(6) | C(1)-N(2)-Cu(1)     | 112.7(5) |
| N(3)-N(2)-Cu(1)       | 141.9(5) | N(4)-N(3)-Cu(1)#1   | 126.2(5) |
| N(2)-N(3)-Cu(1)#1     | 123.7(5) | C(12)-N(6)-Cu(2)    | 126.7(6) |
| C(8)-N(6)-Cu(2)       | 114.7(5) | N(8)-N(7)-Cu(1)     | 112.1(4) |
| C(7)-N(7)-Cu(1)       | 139.5(5) | N(8)-N(9)-Cu(2)#3   | 126.1(5) |
| N(10)-N(9)-Cu(2)#3    | 124.9(4) | C(7)-N(10)-Cu(2)    | 113.0(5) |
| N(9)-N(10)-Cu(2)      | 141.2(5) | C(18)-N(11)-Cu(3)   | 126.7(6) |
| C(14)-N(11)-Cu(3)     | 114.3(6) | C(13)-N(12)-Cu(3)   | 110.6(5) |
| N(13)-N(12)-Cu(3)     | 142.4(6) | N(13)-N(14)-Cu(2)   | 132.0(6) |
| N(15)-N(14)-Cu(2)     | 115.3(5) | N(9)#3-Cu(2)-N(10)  | 93.7(2)  |
| N(9)#3-Cu(2)-N(14)    | 92.5(2)  | N(10)-Cu(2)-N(14)   | 173.5(3) |
| N(9)#3-Cu(2)-N(6)     | 174.3(2) | N(10)-Cu(2)-N(6)    | 80.7(3)  |
| N(14)-Cu(2)-N(6)      | 93.1(3)  | N(11)#4-Cu(3)-N(11) | 180.0(1) |
| N(11)#4-Cu(3)-N(12)   | 98.2(3)  | N(11)-Cu(3)-N(12)   | 81.8(3)  |
| N(11)#4-Cu(3)-N(12)#4 | 81.8(3)  | N(11)-Cu(3)-N(12)#4 | 98.2(3)  |
| N(12)-Cu(3)-N(12)#4   | 180.0(1) |                     |          |

Symmetry codes for **2**: #1 -x-1,-y+1,-z    #2 -x-2,-y,-z-1    #3 -x-1,-y,-z    #4 -x-2,-y-1,-z

|                  |            |                  |          |
|------------------|------------|------------------|----------|
| Ag(1)-N(6)       | 2.162(7)   | Ag(1)-N(7)       | 2.176(7) |
| Ag(1)-Ag(2)      | 3.1280(11) | N(2)-Ag(3)       | 2.287(7) |
| Ag(2)-N(5)       | 2.183(7)   | Ag(2)-N(8)       | 2.280(7) |
| Ag(2)-O(5)       | 2.474(7)   | Ag(3)-N(10)      | 2.215(7) |
| Ag(3)-N(9)#5     | 2.327(7)   | N(9)-Ag(3)#7     | 2.327(7) |
| N(6)-Ag(1)-N(7)  | 162.4(3)   | N(6)-Ag(1)-Ag(2) | 94.9(2)  |
| N(7)-Ag(1)-Ag(2) | 67.53(19)  | N(3)-N(2)-Ag(3)  | 121.7(6) |
| C(1)-N(2)-Ag(3)  | 132.3(6)   | N(5)-Ag(2)-N(8)  | 157.3(3) |

**Supplementary Material (ESI) for CrystEngComm**  
**This journal is © The Royal Society of Chemistry**

|                                                                                                        |                     |                    |           |
|--------------------------------------------------------------------------------------------------------|---------------------|--------------------|-----------|
| N(5)-Ag(2)-O(5)                                                                                        | 108.5(3)            | N(8)-Ag(2)-O(5)    | 94.0(3)   |
| N(5)-Ag(2)-Ag(1)                                                                                       | 93.6(2)             | N(8)-Ag(2)-Ag(1)   | 64.12(18) |
| O(5)-Ag(2)-Ag(1)                                                                                       | 157.63(18)          | N(10)-Ag(3)-N(2)   | 127.0(3)  |
| N(10)-Ag(3)-N(9)#5                                                                                     | 130.9(3)            | N(2)-Ag(3)-N(9)#5  | 101.5(3)  |
| N(3)#6-N(5)-Ag(2)                                                                                      | 125.0(6)            | N(4)-N(5)-Ag(2)    | 122.8(6)  |
| C(8)-N(6)-Ag(1)                                                                                        | 119.5(6)            | C(7)-N(6)-Ag(1)    | 123.8(6)  |
| N(10)-N(7)-Ag(1)                                                                                       | 135.4(6)            | N(8)-N(7)-Ag(1)    | 113.4(5)  |
| N(7)-N(8)-Ag(2)                                                                                        | 113.2(5)            | N(9)-N(8)-Ag(2)    | 137.8(6)  |
| C(9)-N(9)-Ag(3)#7                                                                                      | 120.5(6)            | N(8)-N(9)-Ag(3)#7  | 132.4(5)  |
| N(7)-N(10)-Ag(3)                                                                                       | 130.0(5)            | C(9)-N(10)-Ag(3)   | 124.6(6)  |
| Symmetry codes for <b>3</b> : #1 -x,-y-1,-z-2      #2 x+1,-y-1/2,z+1/2      #3 x-1,y,z      #4 x+1,y,z |                     |                    |           |
| #5 x,-y-1/2,z+1/2                                                                                      | #6 x-1,-y-1/2,z-1/2 | #7 x,-y-1/2,z-1/2  |           |
| Ag(1)-N(4)                                                                                             | 2.319(11)           | Ag(1)-N(7)#2       | 2.357(10) |
| Ag(1)-N(5)                                                                                             | 2.369(10)           | Ag(2)-N(2)         | 2.221(11) |
| Ag(2)-N(12)#3                                                                                          | 2.229(12)           | Ag(2)-N(13)#2      | 2.321(11) |
| N(7)-Ag(1)#4                                                                                           | 2.357(10)           | N(12)-Ag(2)#5      | 2.229(12) |
| N(13)-Ag(2)#4                                                                                          | 2.321(11)           | N(4)-Ag(1)-N(7)#2  | 104.3(4)  |
| N(4)-Ag(1)-N(5)                                                                                        | 113.3(4)            | N(7)#2-Ag(1)-N(5)  | 106.2(4)  |
| N(2)-Ag(2)-N(12)#3                                                                                     | 136.3(4)            | N(2)-Ag(2)-N(13)#2 | 110.2(4)  |
| N(12)#3-Ag(2)-N(13)#2                                                                                  | 111.3(4)            | N(4)-N(2)-Ag(2)    | 124.8(9)  |
| N(1)-N(2)-Ag(2)                                                                                        | 123.9(9)            | N(2)-N(4)-Ag(1)    | 121.9(8)  |
| N(3)-N(4)-Ag(1)                                                                                        | 128.8(9)            | N(13)-N(5)-Ag(1)   | 117.1(8)  |
| C(1)-N(5)-Ag(1)                                                                                        | 136.4(8)            | N(13)-N(7)-Ag(1)#4 | 123.9(8)  |
| N(12)-N(7)-Ag(1)#4                                                                                     | 127.1(8)            | C(1)-N(12)-Ag(2)#5 | 133.4(8)  |
| N(7)-N(12)-Ag(2)#5                                                                                     | 119.9(8)            | N(7)-N(13)-Ag(2)#4 | 119.8(8)  |
| N(5)-N(13)-Ag(2)#4                                                                                     | 129.6(8)            |                    |           |
| Symmetry codes for <b>4</b> : #1 -x,y,-z+3/2      #2 -x+1/2,y-1/2,-z+3/2      #3 x,y-1,z      #4 -     |                     |                    |           |
| x+1/2,y+1/2,-z+3/2                                                                                     | #5 x,y+1,z          |                    |           |

**Table S2.** Hydrogen-bonding geometries (Å, °) of compounds **1** and **4**

|                   | D-H...A        | D-H   | H...A | D...A | D-H...A |
|-------------------|----------------|-------|-------|-------|---------|
| <b>Compound 1</b> | C10-H10A...O19 | 0.929 | 2.533 | 3.400 | 155.41  |
| <b>Compound 4</b> | C9-H9A...O18   | 0.930 | 3.019 | 3.066 | 84.12   |

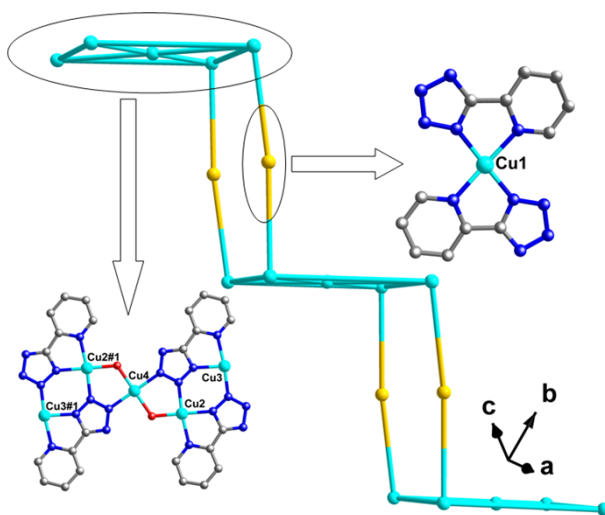

**Fig. S1.** The penta-nuclear clusters and mono-nuclear Cu<sup>II</sup> subunits for construction of the 1D stair-like Cu-2-ptz chain in **1**. **Symmetry codes: #1 4-x, -1-y, -z**

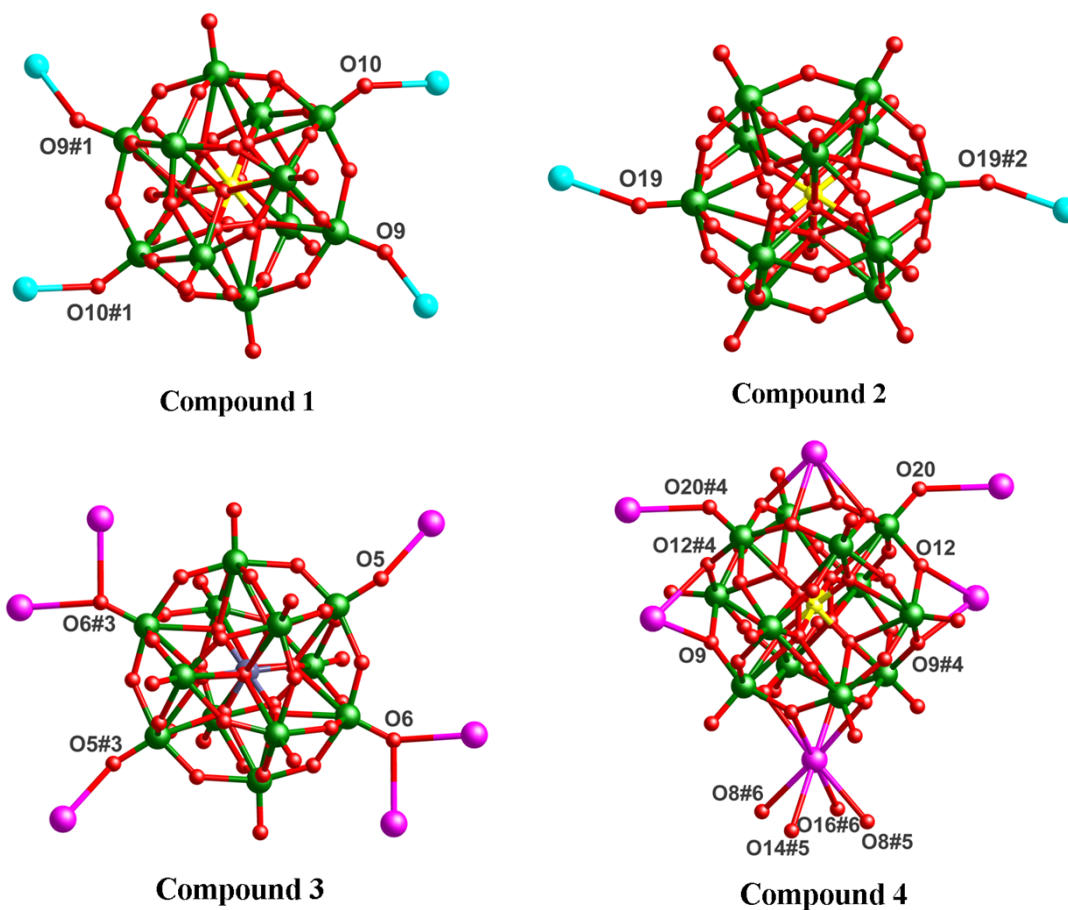

**Fig. S2.** The coordination modes of Keggin anions in the title compounds. Symmetry codes: #1 2-x, -2-y, 2-z; #2 -2-x, -y, -1-z; #3 -x, -1-y, -2-z; #4 -x, y, -1.5-z; #5 -x, 1+y, 1.5-z; #6 x, 1+y, z.

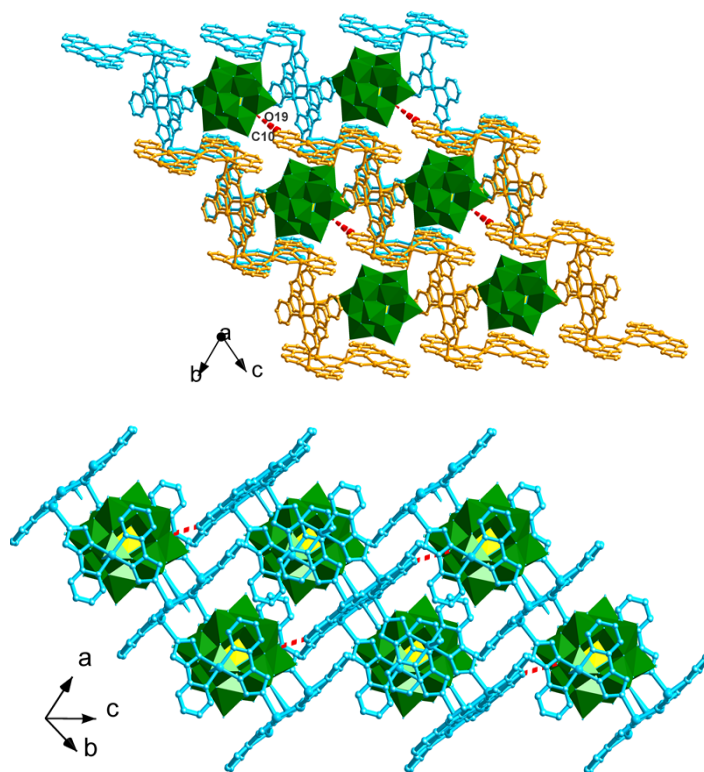

**Fig. S3.** The 3D supramolecular framework of **1** with C–H···O (C(10)–H(10A)···O(19)) = 3.400 Å hydrogen-bonding interactions.

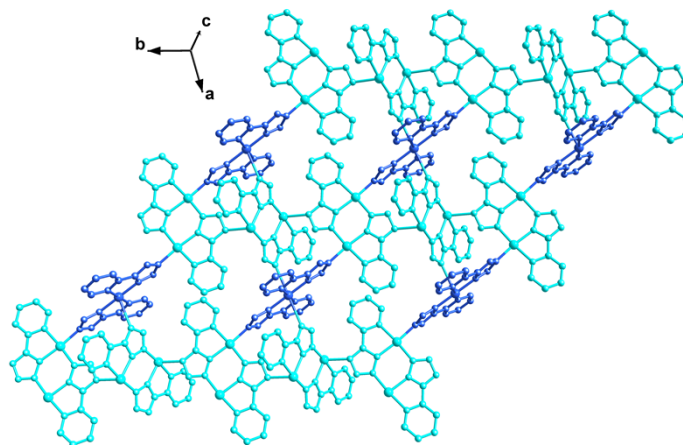

**Fig. S4.** The 2D layer of compound **2**.

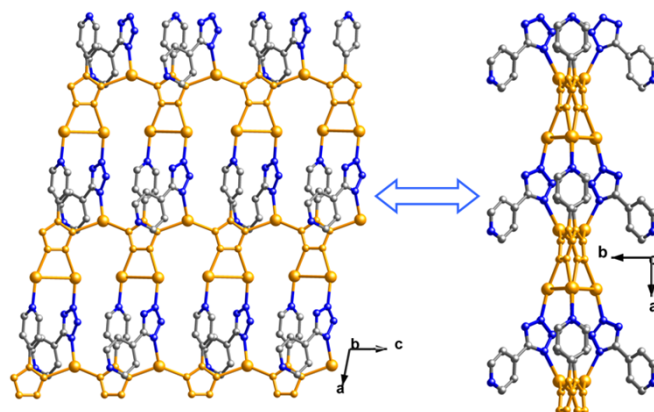

Fig. S5. The 2D layer of compound **3** viewed along *b*- and *c*-axis.

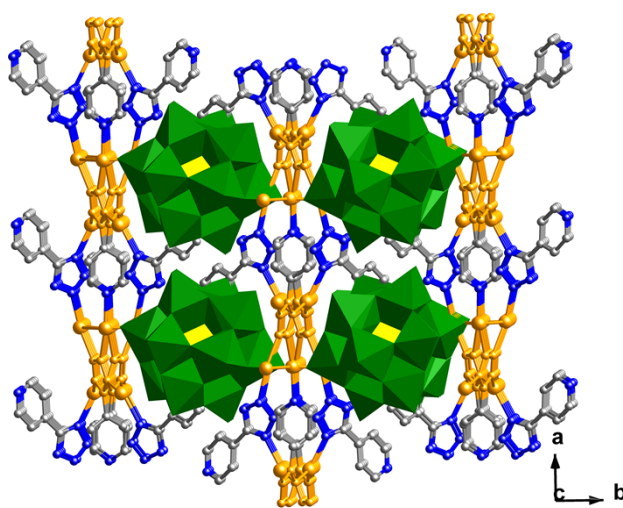

Fig. S6. The 3D structure of compound **3**.

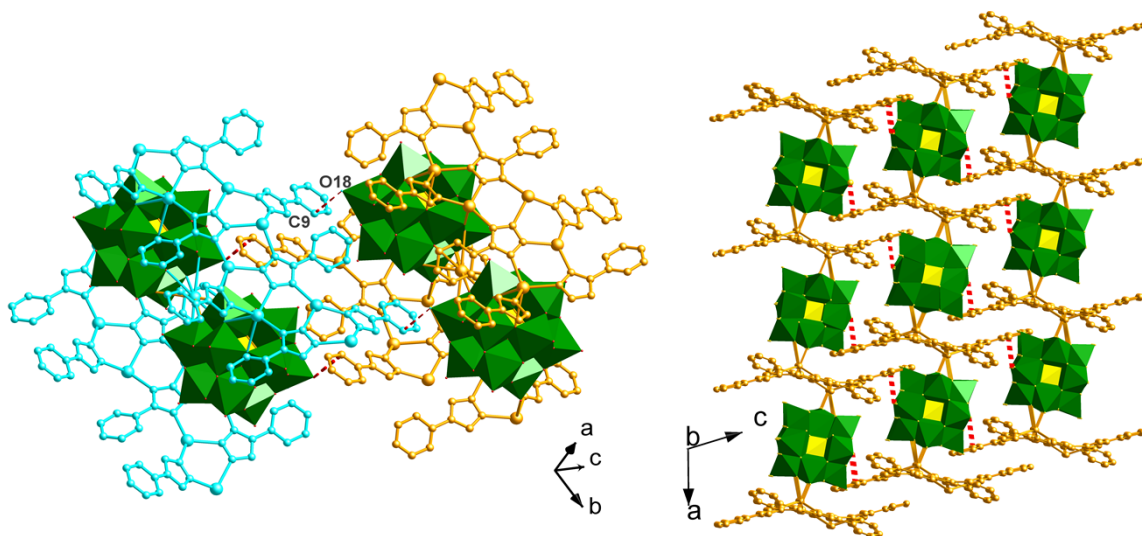

Fig. S7. The 3D supramolecular framework of **4** with C–H···O (C(9)–H(9A)···O(18) = 3.066 Å) hydrogen-bonding interactions.



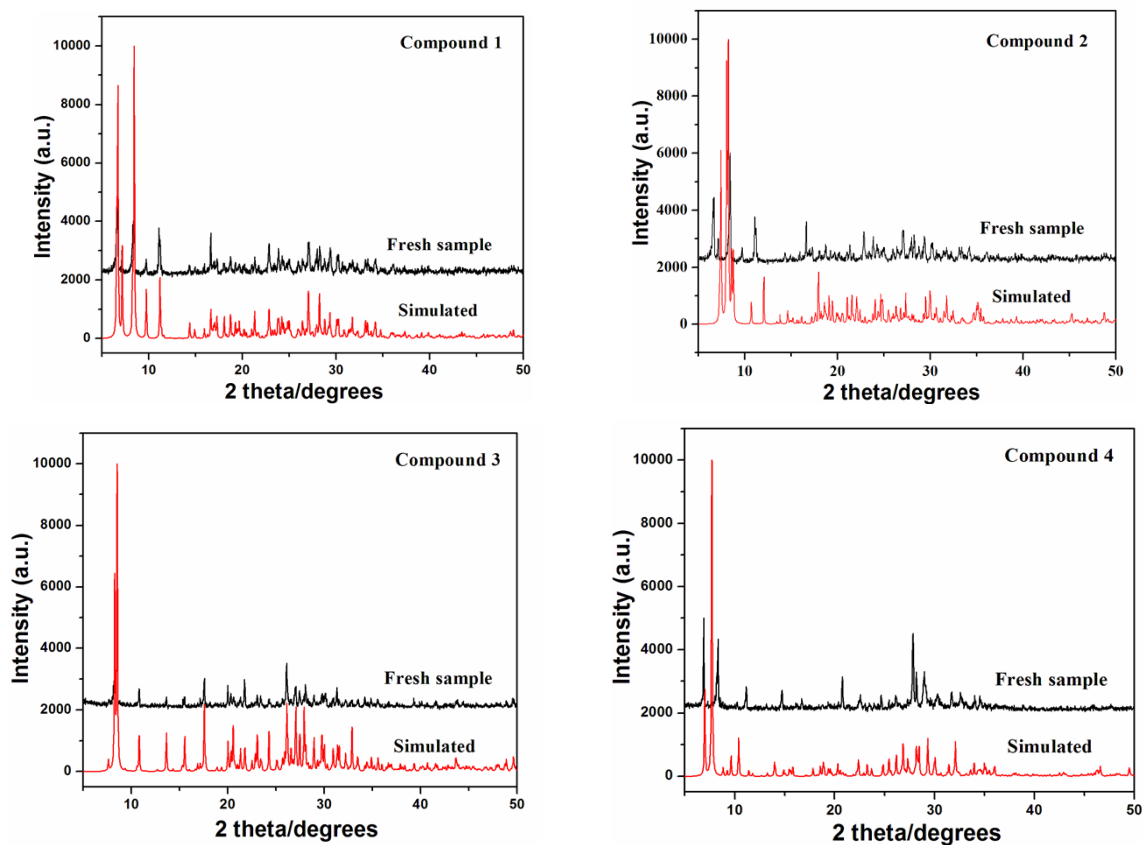

Fig. S8. The XRD patterns of compounds 1–4.

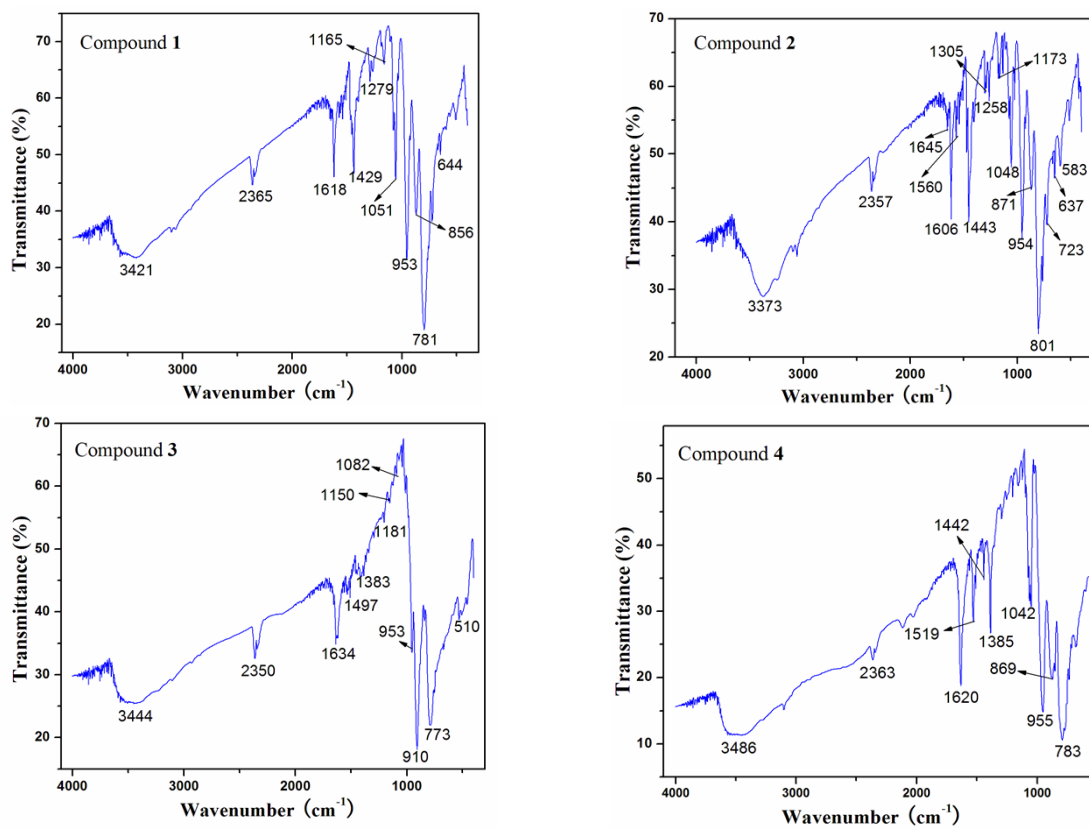

Fig. S9. The IR spectra of compounds 1–4.



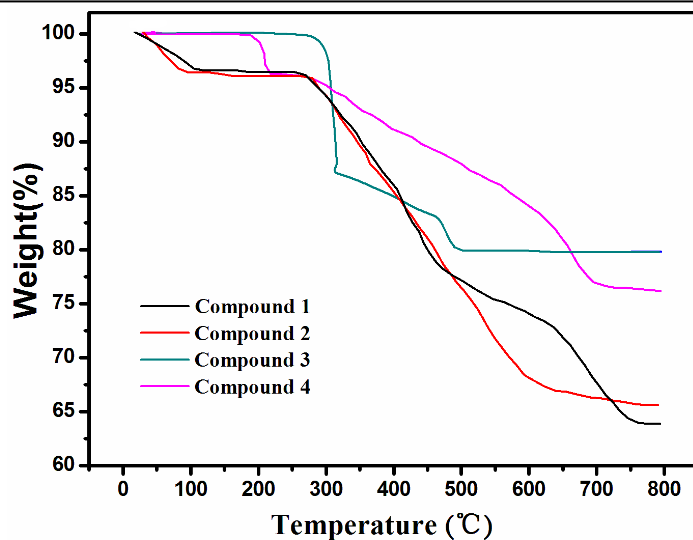

Fig. S10. The TGA curves of the compounds 1–4.

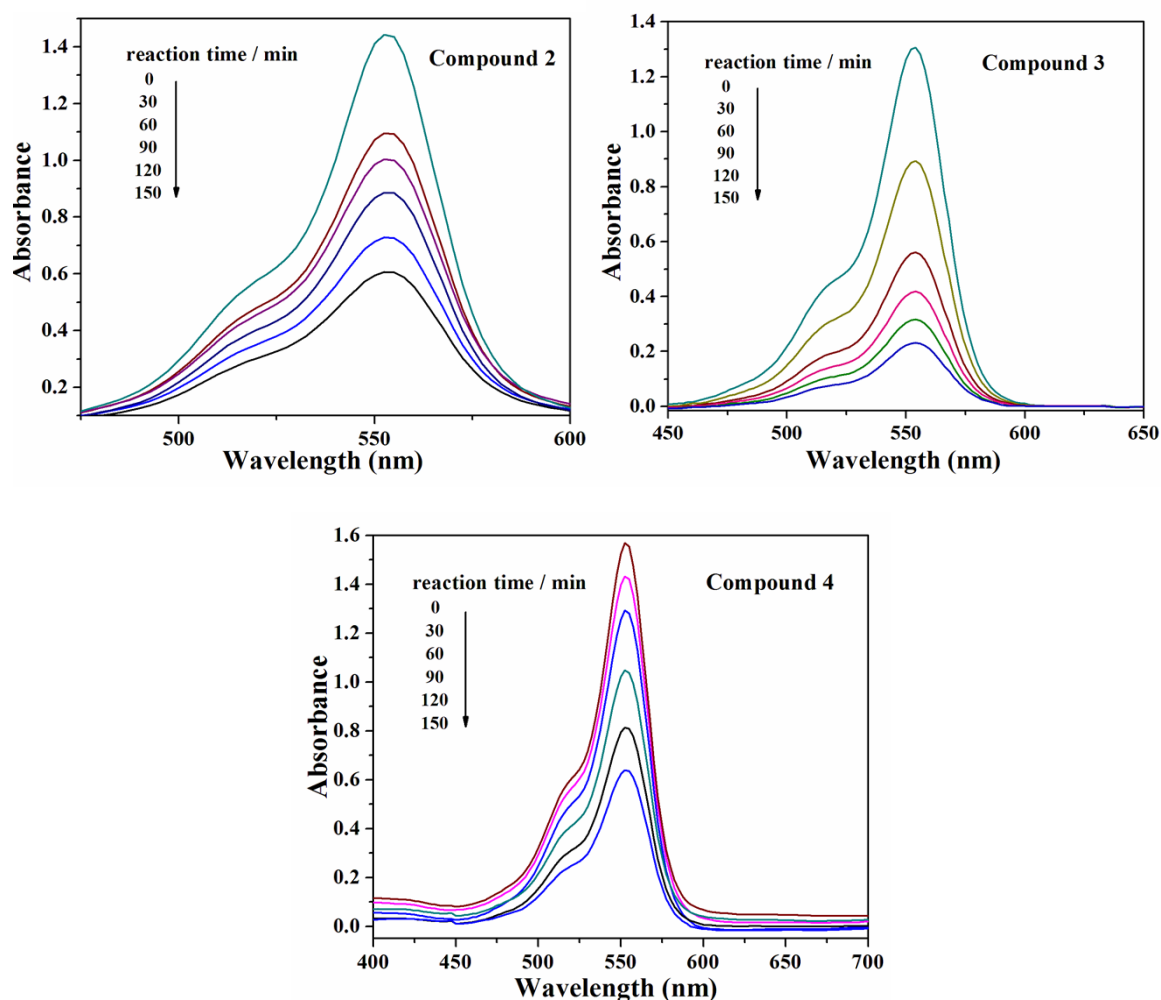

Fig. S11. Absorption spectra of the RhB solution during the decomposition reaction under UV irradiation with the presence of compounds 2–4.

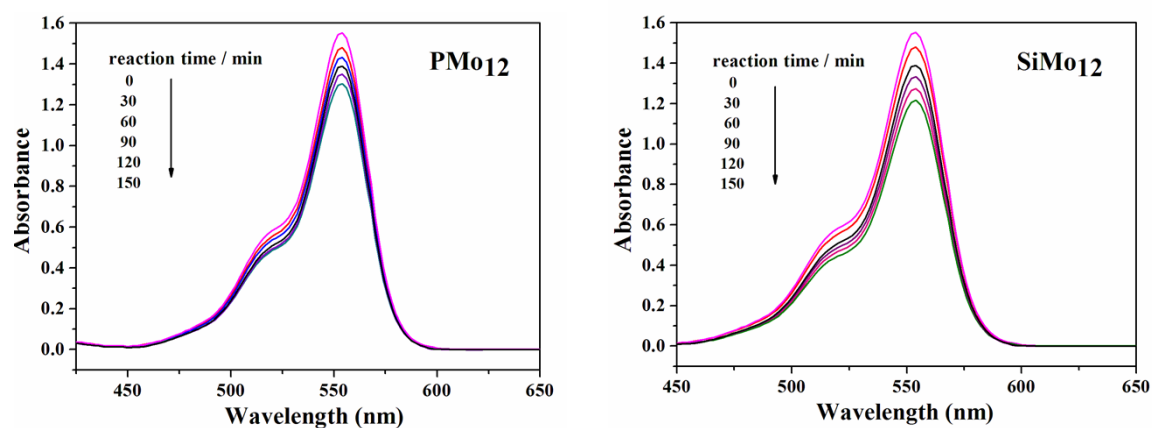

Fig. S12. Absorption spectra of the RhB solution during the decomposition reaction under UV irradiation with the presence of parent POM (PMo<sub>12</sub> and SiMo<sub>12</sub>).

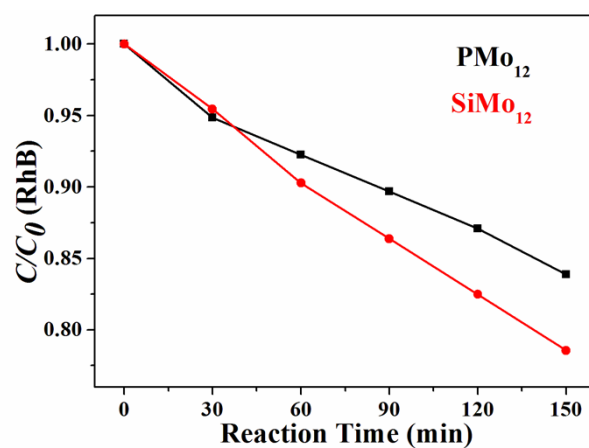

Fig. S13. Photocatalytic decomposition rate of MB solution under UV irradiation with the use of parent POMs. (Black: PMo<sub>12</sub> and Red: SiMo<sub>12</sub>).

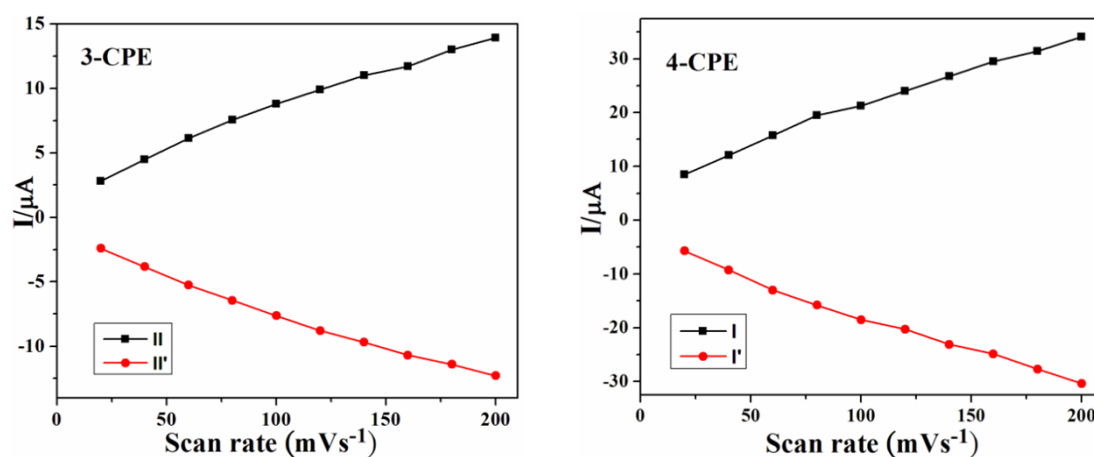

Fig. S14. The dependence of anodic peak (II) and cathodic peak (II') currents for 3-CPE and anodic peak (I) and cathodic peak (I') currents for 4-CPE on scan rates.

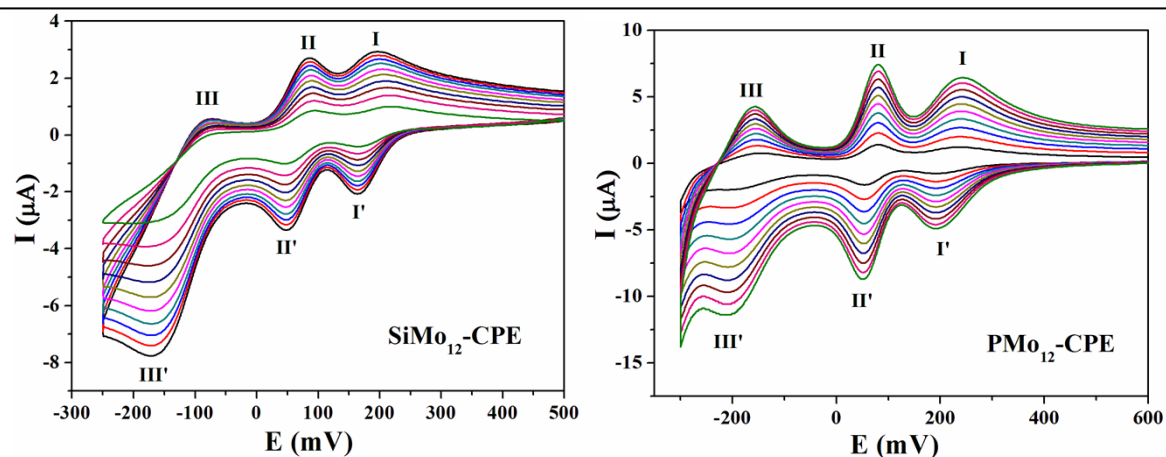

**Fig. S15.** Cyclic voltammograms of the SiMo<sub>12</sub>- and PMo<sub>12</sub>-CPEs in 0.1 M H<sub>2</sub>SO<sub>4</sub> + 0.5 M Na<sub>2</sub>SO<sub>4</sub> aqueous solution at different scan rates (from inner to outer: 20, 40, 60, 80, 100, 120, 140, 160, 180 and 200 mVs<sup>-1</sup>, respectively).

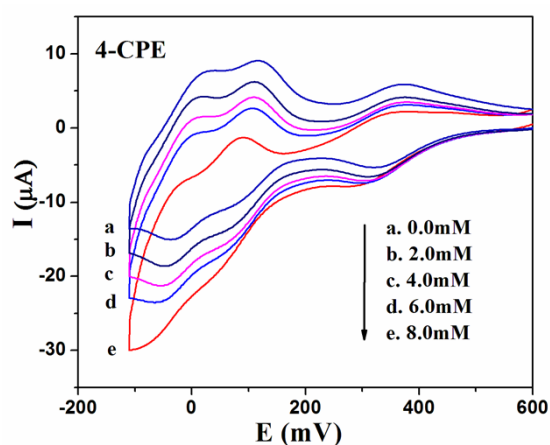

**Fig. S16.** Cyclic voltammograms of the 4-CPE in 0.1 M H<sub>2</sub>SO<sub>4</sub> + 0.5 M Na<sub>2</sub>SO<sub>4</sub> aqueous solution containing 0.0–8.0 mM KNO<sub>2</sub>. Scan rate: 200mV·s<sup>-1</sup>.
